# Supplementary material
Source: PubMed Central journal article supplement (PMC8170702)
Supplement: NIHMS1702595-supplement-Supplementary_Figure_1.pdf [file NIHMS1702595-supplement-Supplementary_Figure_1.pdf]

### #1a vs #2a pf

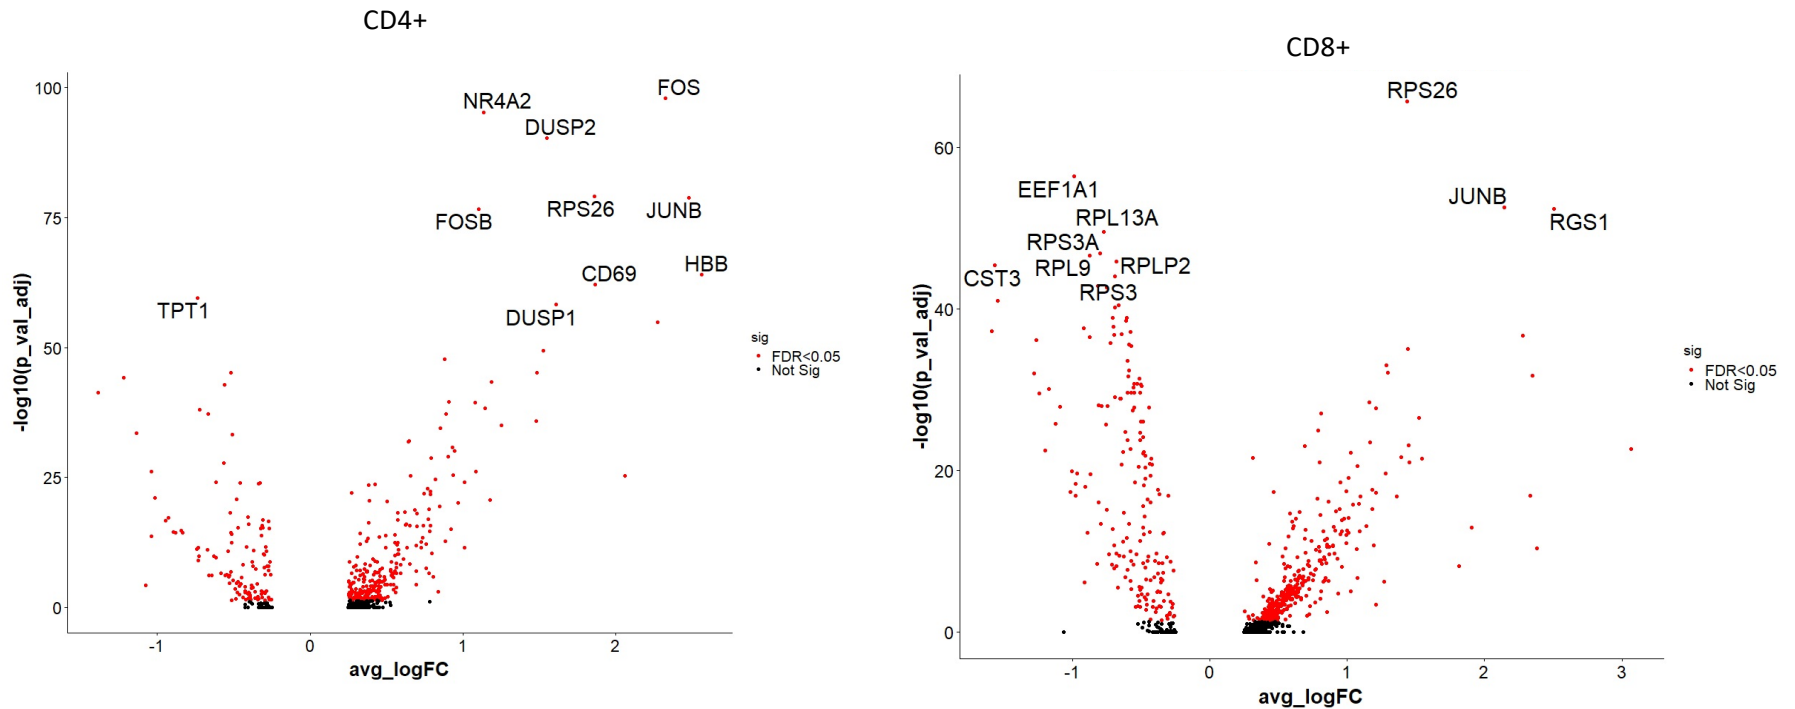

**Supplementary Figure 1. Volcano plot of gene expression level comparison of baseline samples between patient #1 and #2 before treatment.** Shown as top differentially expressed genes from CD4+ (left panel) or CD8+ (right panel) cells from #1a compared with #2a pf. X axis depicts fold change, Y axis depicts adjusted p value.

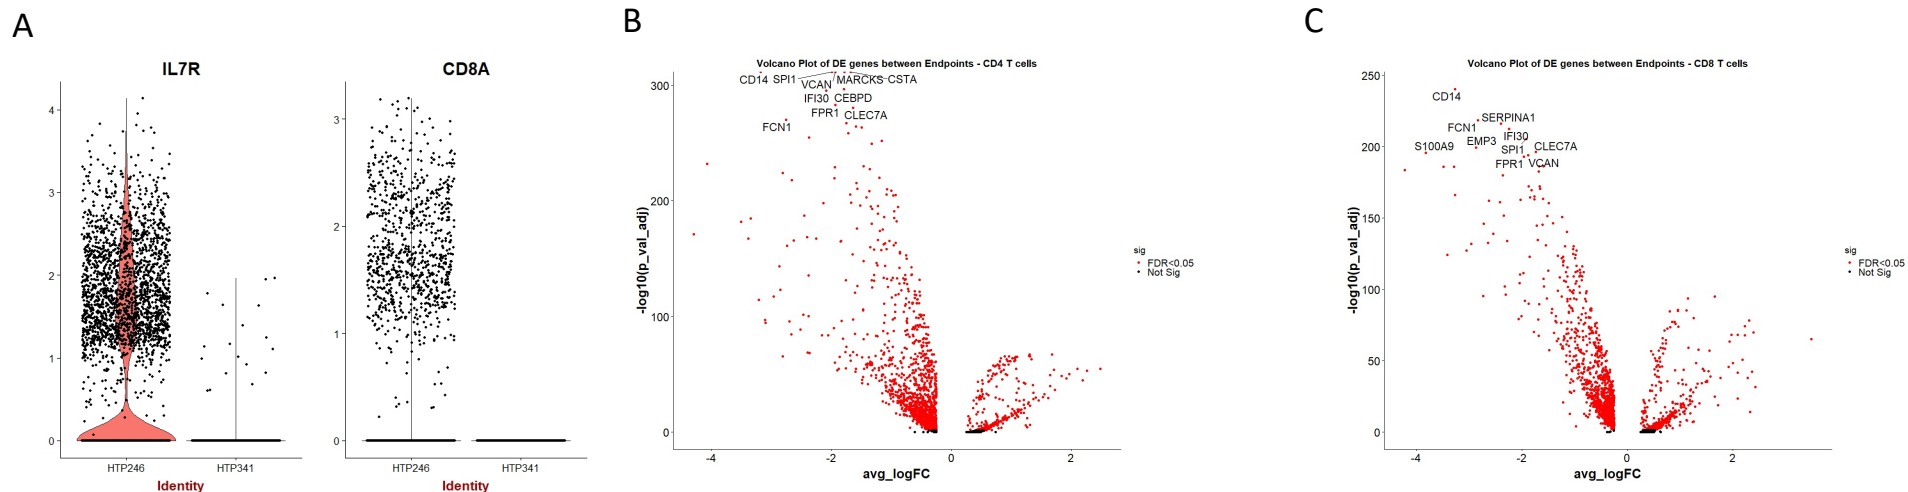

**Supplementary Figure 2. Comparison of between patient #1 and #2 after treatment of nab-paclitaxel and pembrolizumab. (A)** Shown as top differentially expressed identity genes from CD4+ (left) or CD8+ (right) cells patient #1 (#1c) and #2 (#2c pf). **(B, C)** Volcano plot of CD4+ **(B)** and CD8+ **(C)** gene expression level comparison of samples between patient #1 (#1c) and #2 (#2c pf) after treatment. X axis depicts fold change, Y axis depicts adjusted p value.
